# Supplementary material for: Highly efficient polymer solar cells via multiple cascade energy level engineering
Source: Royal Society of Chemistry journal article supplement (doi:10.1039/c8tc03024c), 2018-01-01
Supplement: c8tc03024c1.pdf [file c8tc03024c1.pdf]

## Supporting Information

### Highly Efficient Polymer Solar Cells *via* a Multiple Cascade Energy Level Engineering Strategy

Zuojia Li,<sup>a</sup> Dongsheng Tang,<sup>a</sup> Zhenkai Ji,<sup>a</sup> Wei Zhang,<sup>b,\*</sup> Xiaopeng Xu,<sup>a</sup> Kui Feng,<sup>a</sup>

Ying Li,<sup>a</sup> Qiang Peng<sup>a,\*</sup>

<sup>a</sup>Key Laboratory of Green Chemistry and Technology of Ministry of Education, College of  
Chemistry, and State Key Laboratory of Polymer Materials Engineering, Sichuan University,

Chengdu 610064, P. R. China

<sup>b</sup>Chongqing Institute of Green and Intelligent Technology, Chinese Academy of Sciences,

Chongqing 400714, PR China

\*To whom correspondence should be addressed: Tel: +86-28-86510868; fax: +86-28-86510868;

e-mail: [andyzhangwei@163.com](mailto:andyzhangwei@163.com); [qiangpengjohnny@yahoo.com](mailto:qiangpengjohnny@yahoo.com)

## 1. J-V curves PTB7:PC<sub>71</sub>BM with or without polymeric additives

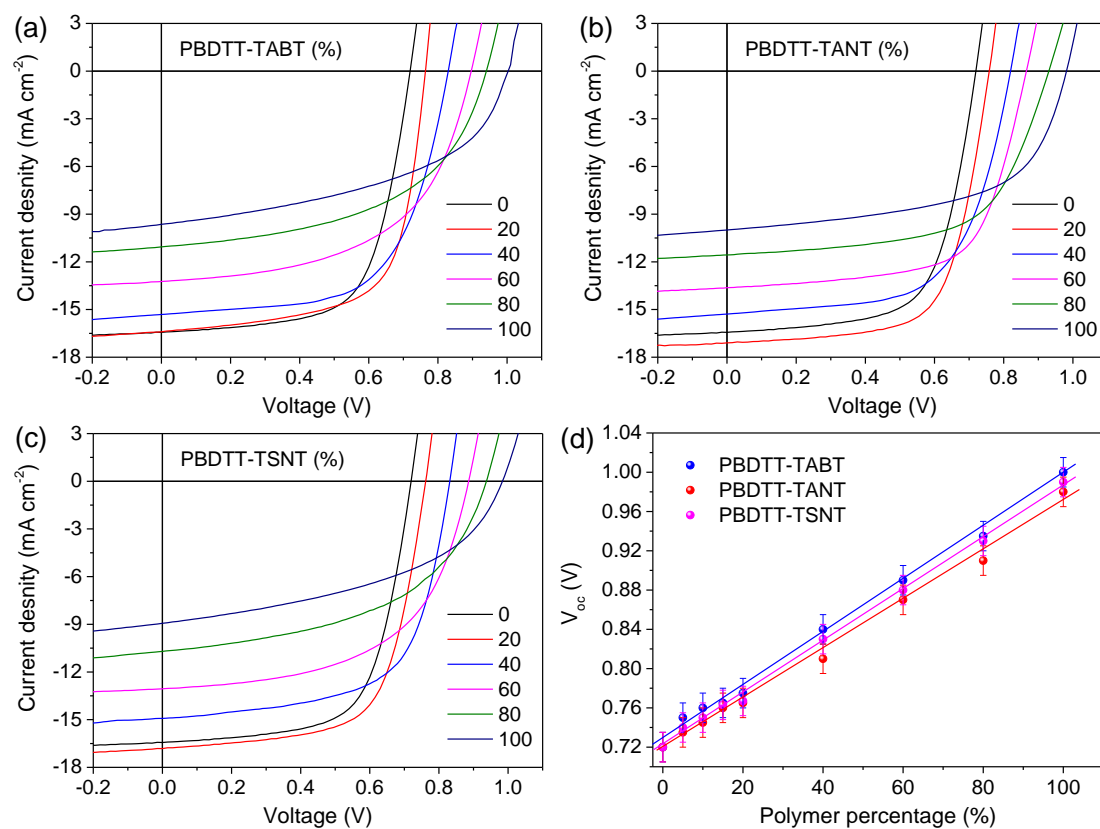

**Fig. S1** J-V curves of PTB7-based ternary blend PSCs with different amount of PBDTT-TABT (a), PBDTT-TANT (b), and PBDTT-TSNT (c). (d) Dependence of the  $V_{oc}$  of the PSCs on the polymer additives content.

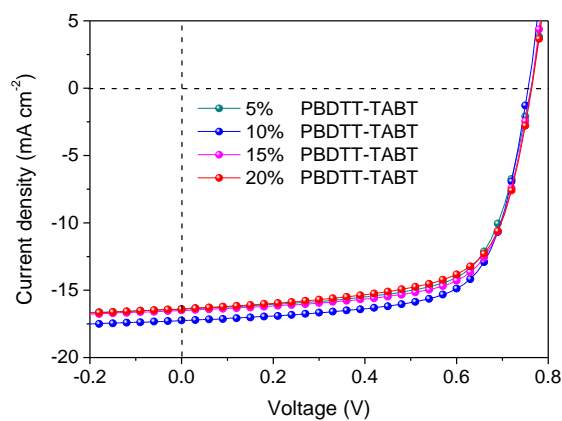

**Fig. S2** J-V curves of PBDTT-TABT-based ternary blend PSCs.

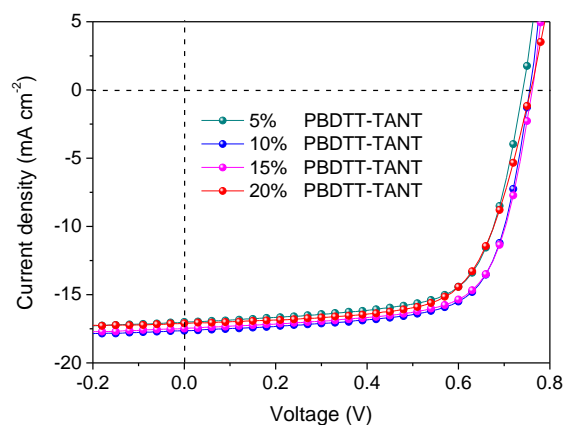

**Fig. S3** J-V curves of PBDTT-TANT-based ternary PSCs.

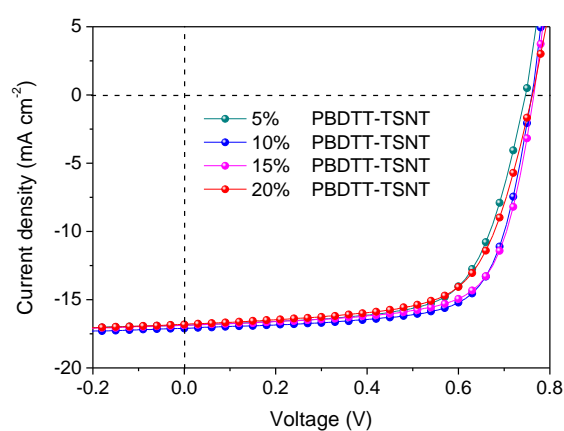

**Fig. S4** J-V curves of PBDTT-TSNT-based ternary blend PSCs.

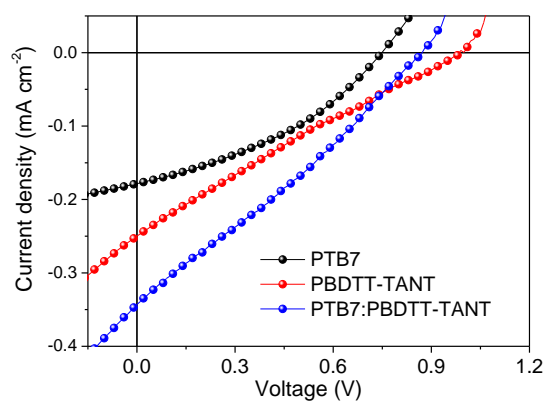

**Fig. S5** J-V curves of PSCs based on PTB7, PBDTT-TANT and PTB7:PBDTT-TANT (1:1) as active layer (without PC<sub>71</sub>BM).

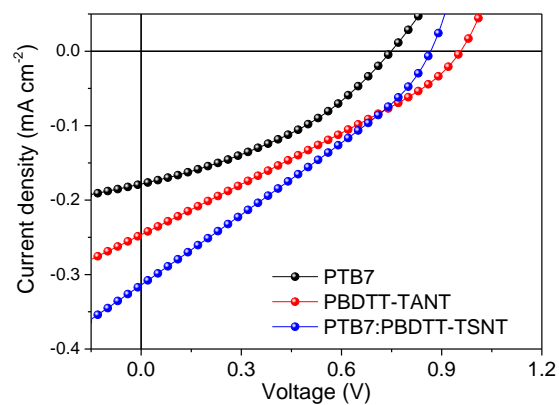

**Fig. S6** J-V curves of PSCs based on PTB7, PBDTT-TSNT and PTB7:PBDTT-TSNT (1:1) as active layer (without PC<sub>71</sub>BM).

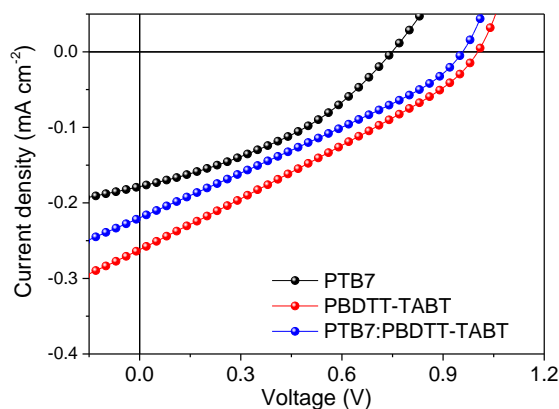

**Fig. S7** J-V curves of PSCs based on PTB7, PBDTT-TABT and PTB7:PBDTT-TABT (1:1) as active layer (without PC<sub>71</sub>BM).

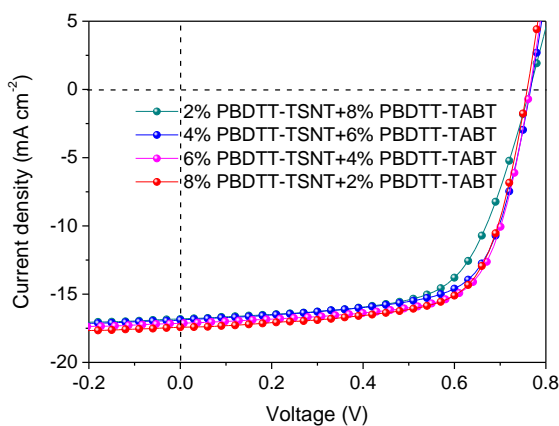

**Fig. S8** J-V curves of PBDTT-TSNT:PBDTT-TABT-based quaternary PSCs.

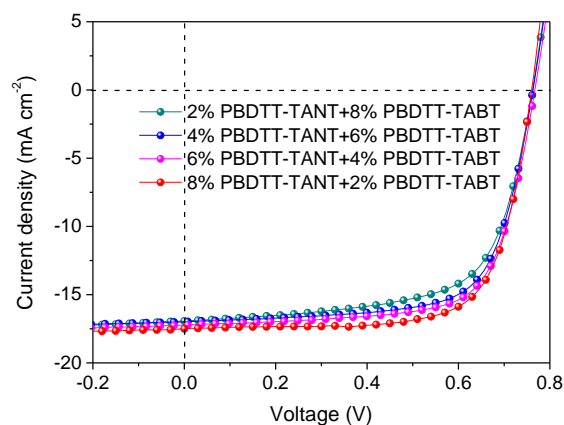

**Fig. S9** J-V curves of, PBDTT-TANT:PBDTT-TABT-based quaternary blend PSCs.

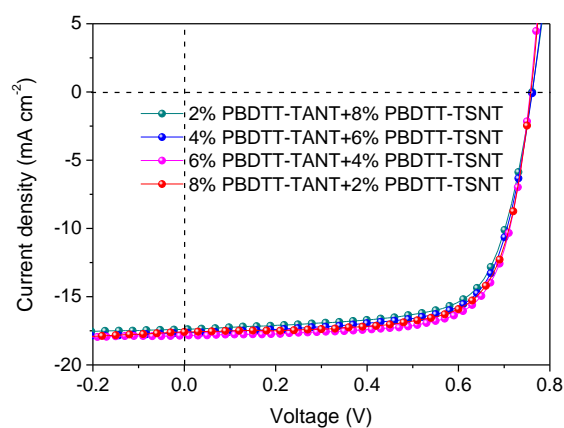

**Fig. S10** J-V curves of PBDTT-TANT:PBDTT-TSNT- based quaternary blend PSCs.

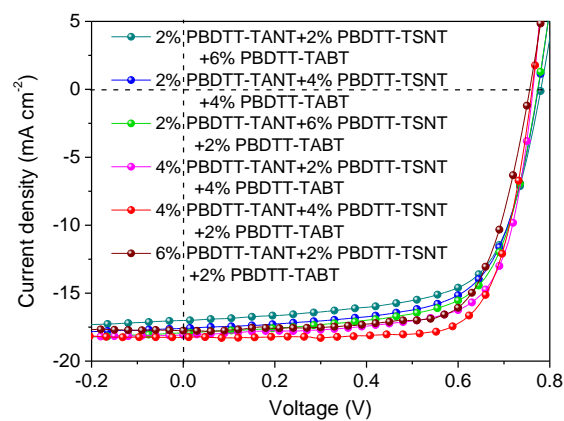

**Fig. S11** J-V curves of PTB7-based quintuple blend PSCs.

## 2. Performance summary of PTB7:PC<sub>71</sub>BM with or without additional copolymers.

**Table S1** Device data of the multiple blend PSCs.

| Blend type                  | Donor composition | V <sub>oc</sub><br>(V) | J <sub>sc</sub><br>(mA·cm <sup>-2</sup> ) | FF<br>(%) | PCE <sub>max/ave</sub><br>(%) | R <sub>s</sub><br>(Ω·cm <sup>2</sup> ) | R <sub>sh</sub><br>(Ω·cm <sup>2</sup> ) |
|-----------------------------|-------------------|------------------------|-------------------------------------------|-----------|-------------------------------|----------------------------------------|-----------------------------------------|
| Binary blend <sup>[a]</sup> | 100% PTB7         | 0.720                  | 15.87                                     | 65.6      | 7.50/7.24                     | 8.7                                    | 806.9                                   |
|                             | 100% PBDTT-TABT   | 0.975                  | 11.12                                     | 62.1      | 6.74/6.61                     | 12.8                                   | 494.2                                   |
|                             | 100% PBDTT-TANT   | 0.945                  | 13.06                                     | 65.2      | 8.04/7.84                     | 10.8                                   | 629.2                                   |
|                             | 100% PBDTT-TSNT   | 0.975                  | 10.32                                     | 60.9      | 6.13/5.96                     | 14.7                                   | 601.8                                   |
| Ternary blend               | 5% PBDTT-TABT     | 0.765                  | 16.41                                     | 67.4      | 8.46/8.20                     | 6.3                                    | 548.0                                   |
|                             | 5% PBDTT-TANT     | 0.735                  | 17.00                                     | 69.2      | 8.65/8.54                     | 5.2                                    | 467.8                                   |
|                             | 5% PBDTT-TSNT     | 0.750                  | 16.94                                     | 67.6      | 8.59/8.39                     | 6.1                                    | 1176.2                                  |
|                             | 10% PBDTT-TABT    | 0.765                  | 16.91                                     | 69.3      | 8.96/8.64                     | 4.3                                    | 933.5                                   |
|                             | 10% PBDTT-TANT    | 0.750                  | 17.64                                     | 70.7      | 9.35/9.00                     | 4.6                                    | 1308.4                                  |

|                     |                |       |       |      |            |     |        |
|---------------------|----------------|-------|-------|------|------------|-----|--------|
|                     | 10% PBDTT-TSNT | 0.765 | 17.11 | 70.2 | 9.18/8.77  | 4.2 | 1203.8 |
|                     | 15% PBDTT-TABT | 0.765 | 16.50 | 68.4 | 8.63/8.34  | 4.4 | 794.3  |
|                     | 15% PBDTT-TANT | 0.765 | 17.48 | 69.3 | 9.27/8.97  | 4.2 | 473.3  |
|                     | 15% PBDTT-TSNT | 0.765 | 16.87 | 69.9 | 9.03/8.68  | 4.3 | 1077.4 |
|                     | 20% PBDTT-TABT | 0.765 | 16.4  | 66.4 | 8.33/8.12  | 4.7 | 443.3  |
|                     | 20% PBDTT-TANT | 0.765 | 17.10 | 66.5 | 8.70/8.55  | 6.4 | 683.6  |
|                     | 20% PBDTT-TSNT | 0.765 | 16.82 | 65.6 | 8.44/8.29  | 6.4 | 621.1  |
| Quaternary<br>blend | 2% PBDTT-TSNT  | 0.765 | 16.82 | 65.9 | 8.32/8.06  | 9.0 | 786.6  |
|                     | +8% PBDTT-TABT |       |       |      |            |     |        |
|                     | 4% PBDTT-TSNT  | 0.765 | 16.89 | 68.2 | 8.81/8.530 | 6.2 | 634.9  |
|                     | +6% PBDTT-TABT |       |       |      |            |     |        |
|                     | 6% PBDTT-TSNT  | 0.765 | 17.13 | 69.9 | 9.16/8.88  | 6.0 | 857.7  |
|                     | +4% PBDTT-TABT |       |       |      |            |     |        |

|                |       |       |      |           |     |        |
|----------------|-------|-------|------|-----------|-----|--------|
| 8% PBDTT-TSNT  | 0.765 | 17.43 | 69.5 | 9.27/9.01 | 6.3 | 1587.0 |
| +2% PBDTT-TABT |       |       |      |           |     |        |
| <hr/>          |       |       |      |           |     |        |
| 2% PBDTT-TANT  | 0.765 | 16.93 | 67.2 | 8.53/8.26 | 6.8 | 623.5  |
| +8% PBDTT-TABT |       |       |      |           |     |        |
| 4% PBDTT-TANT  | 0.765 | 16.98 | 69.8 | 9.07/8.39 | 6.0 | 791.6  |
| +6% PBDTT-TABT |       |       |      |           |     |        |
| 6% PBDTT-TANT  | 0.761 | 17.22 | 70.8 | 9.28/9.00 | 5.9 | 815.5  |
| +4% PBDTT-TABT |       |       |      |           |     |        |
| 8% PBDTT-TANT  | 0.750 | 17.50 | 72.9 | 9.58/9.24 | 5.8 | 1842.4 |
| +2% PBDTT-TABT |       |       |      |           |     |        |
| <hr/>          |       |       |      |           |     |        |
| 2% PBDTT-TANT  | 0.765 | 17.38 | 70.1 | 9.28/9.07 | 5.5 | 824.8  |
| +8% PBDTT-TSNT |       |       |      |           |     |        |
| 4% PBDTT-TANT  | 0.750 | 17.64 | 70.8 | 9.36/9.11 | 5.2 | 859.9  |



|           |                           |       |       |      |           |     |        |
|-----------|---------------------------|-------|-------|------|-----------|-----|--------|
|           | +6% PBDTT-TSNT            |       |       |      |           |     |        |
|           | 6% PBDTT-TANT             | 0.750 | 17.83 | 73.5 | 9.83/9.55 | 5.1 | 1900.1 |
|           | +4% PBDTT-TSNT            |       |       |      |           |     |        |
|           | 8% PBDTT-TANT             | 0.750 | 17.58 | 72.9 | 9.61/9.36 | 5.3 | 1334.0 |
|           | +2% PBDTT-TSNT            |       |       |      |           |     |        |
|           | 2% PBDTT-TANT+2%          |       |       |      |           |     |        |
|           | PBDTT-TSNT+6% PBDTT-TABT  | 0.780 | 17.01 | 66.6 | 8.84/8.61 | 6.5 | 466.0  |
|           | 2% PBDTT-TANT+4%          |       |       |      |           |     |        |
| Quintuple | PBDTT-TSNT+4% PBDTT-TABT  | 0.765 | 17.59 | 67.9 | 9.14/8.87 | 6.5 | 625.5  |
| blend     | 2% PBDTT-TANT+6%          |       |       |      |           |     |        |
|           | PBDTT-TSNT+2% PBDTT-TABT  | 0.765 | 17.93 | 68.5 | 9.39/9.04 | 6.2 | 525.9  |
|           | 4% PBDTT-TANT+2%          |       |       |      |           |     |        |
|           | PBDTT-TSNT +4% PBDTT-TABT | 0.761 | 18.06 | 71.9 | 9.88/9.58 | 4.9 | 612.2  |

|                          |       |       |      |            |     |        |
|--------------------------|-------|-------|------|------------|-----|--------|
| 4% PBDTT-TANT+4%         | 0.756 | 18.24 | 75.4 | 10.40/9.95 | 5.1 | 2468.6 |
| PBDTT-TSNT+2% PBDTT-TABT |       |       |      |            |     |        |
| 6% PBDTT-TANT+2%         | 0.750 | 17.78 | 72.1 | 9.60/9.51  | 6.0 | 1527.0 |
| PBDTT-TSNT+2% PBDTT-TABT |       |       |      |            |     |        |

---

[a] The photovoltaic parameters of PBDTT-TABT-, PBDTT-TANT- and PBDTT-TSNT-based binary blend PSCs came from our previous work [ref. 1].

## References

1 X.P. Xu, K. Feng, K. Li, Q. Peng, *J. Mater. Chem. A*, 2015, **3**, 23149-23161.
